# Supplementary material for: Drosophila models of pathogenic copy-number variant genes show global and non-neuronal defects during development
Source: PLOS journal article supplement (doi:10.1371/journal.pgen.1008792), 2020-06-24

# Cellular processes in larval wing discs

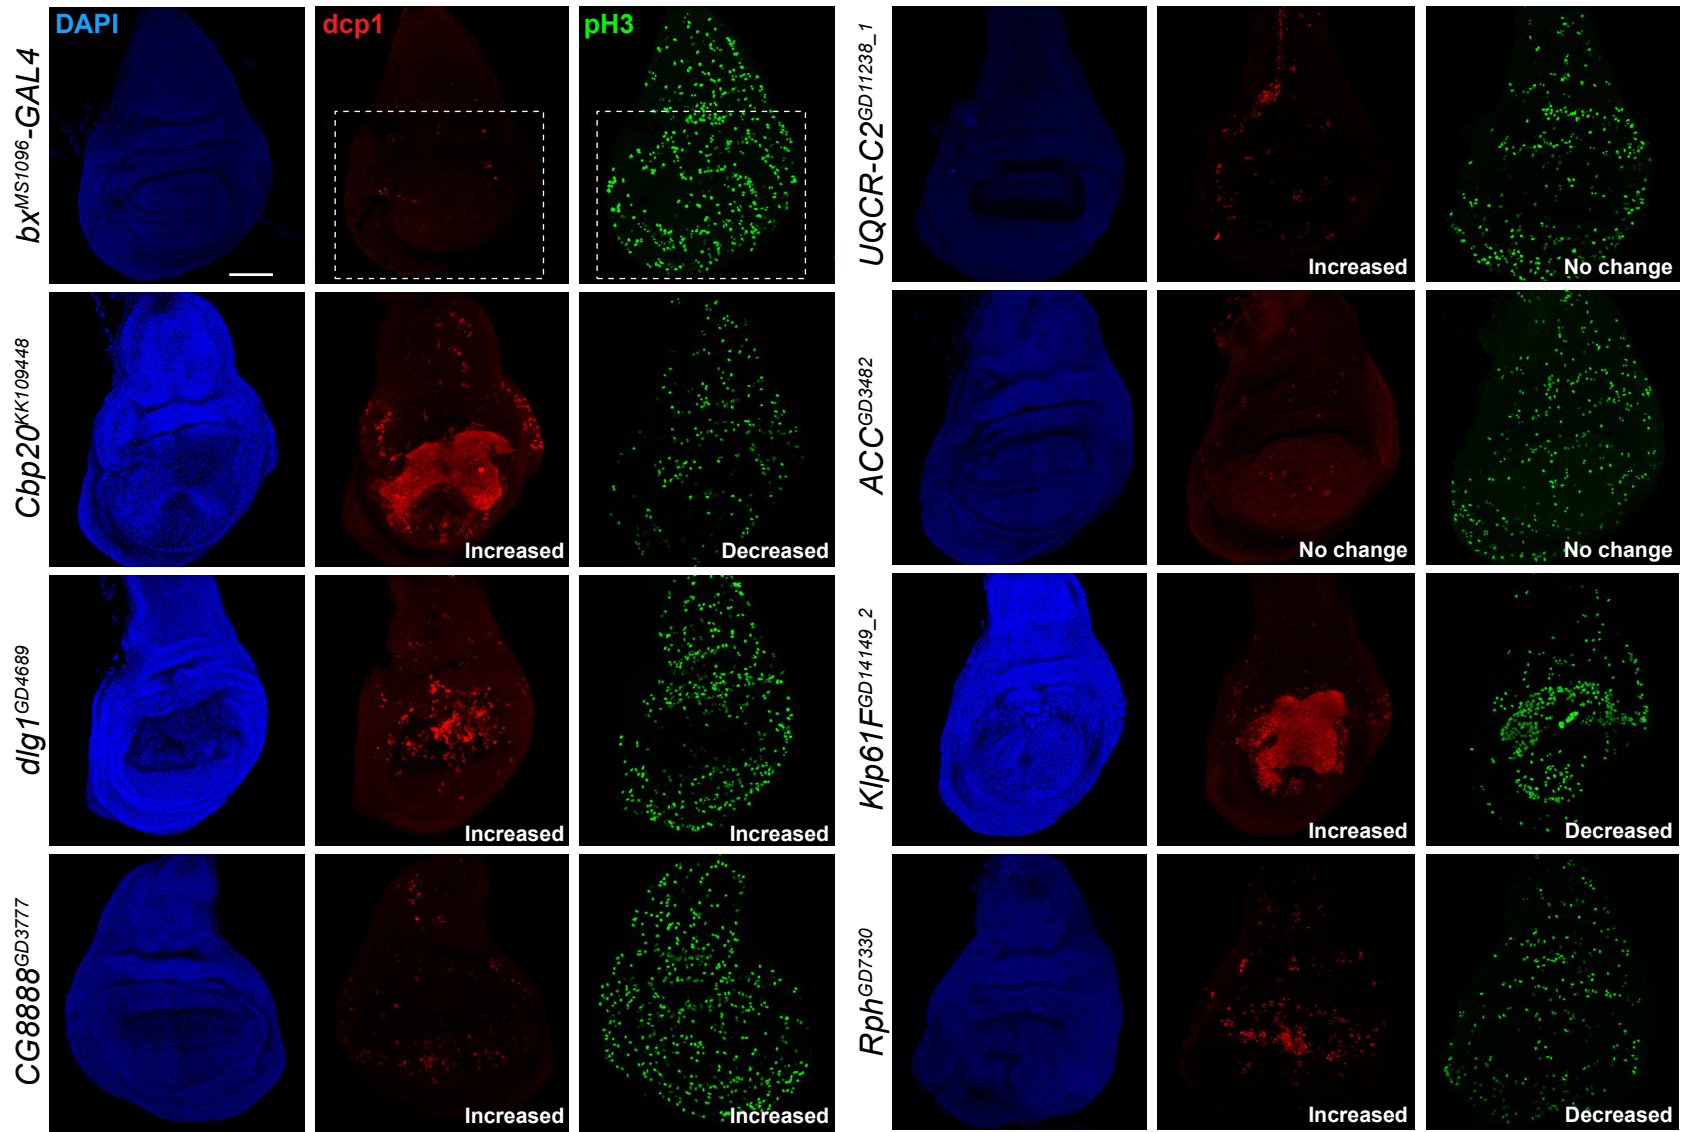

Supplement: S5 (10.1371/journal.pgen.1008792.s005) [file journal.pgen.1008792.s005]
